# Supplementary material for: Exploration of the Polymorphism Distribution of Bovine HMGA2 Gene in Worldwide Breeds and Its Associations with Ovarian Traits
Source: MDPI journal article supplement (doi:10.3390/ani14050796), 2024-03-04
Supplement: s1 [file s1]

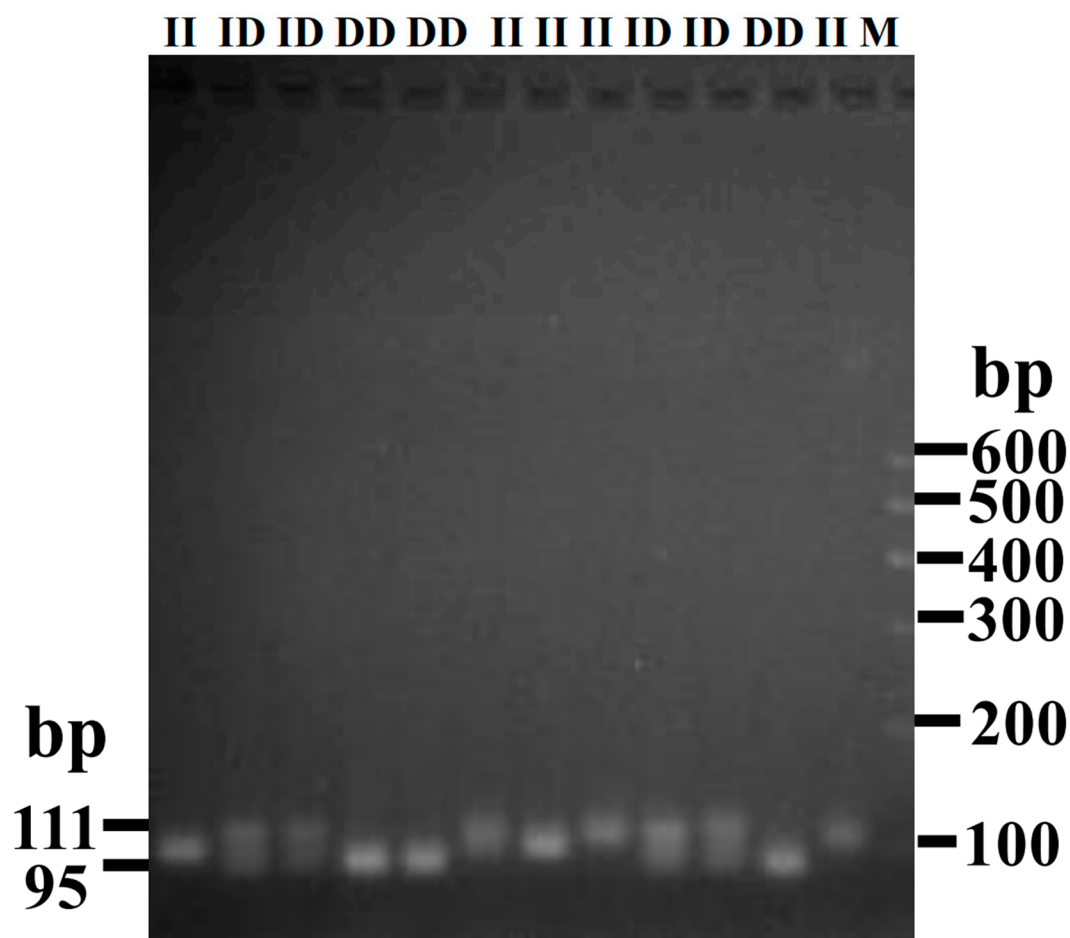

**Figure S1.** Electrophoresis pattern of bovine *HMGA2* gene of P1-I<sub>8</sub>-bp

**Table S1.** Polymorphism parameters of P1-I<sub>8</sub>-bp of bovine *HMGA2* gene.

| Size * | Genotypic frequencies |      |      | Allelic frequencies |      | HWE            | Population parameters |      |       |      |
|--------|-----------------------|------|------|---------------------|------|----------------|-----------------------|------|-------|------|
|        | II                    | ID   | DD   | I                   | D    | <i>P</i> value | Ho                    | He   | Ne    | PIC  |
| 130    | 0.22                  | 0.26 | 0.52 | 0.35                | 0.65 | <i>P</i> <0.05 | 0.52                  | 0.48 | 1.840 | 0.35 |

**Note:** \* refers to the number of individual bovine analyzed. *HWE*, Hardy-Weinberg equilibrium; *Ho*, homozygosity; *He*, heterozygosity; *Ne*, effective number of alleles; *PIC*, Polymorphism information content. **Sizes:** the number of individual cattle analyzed.

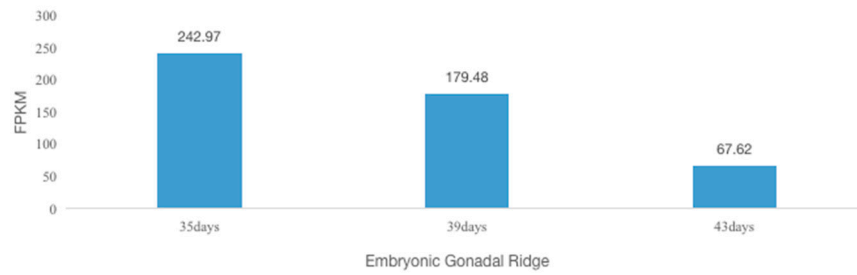

**Figure S2. Expression of *HMGA2* gene in bovine.** Note: FPKM: Fragment Per Kilobase of transcript, per Million mapped reads

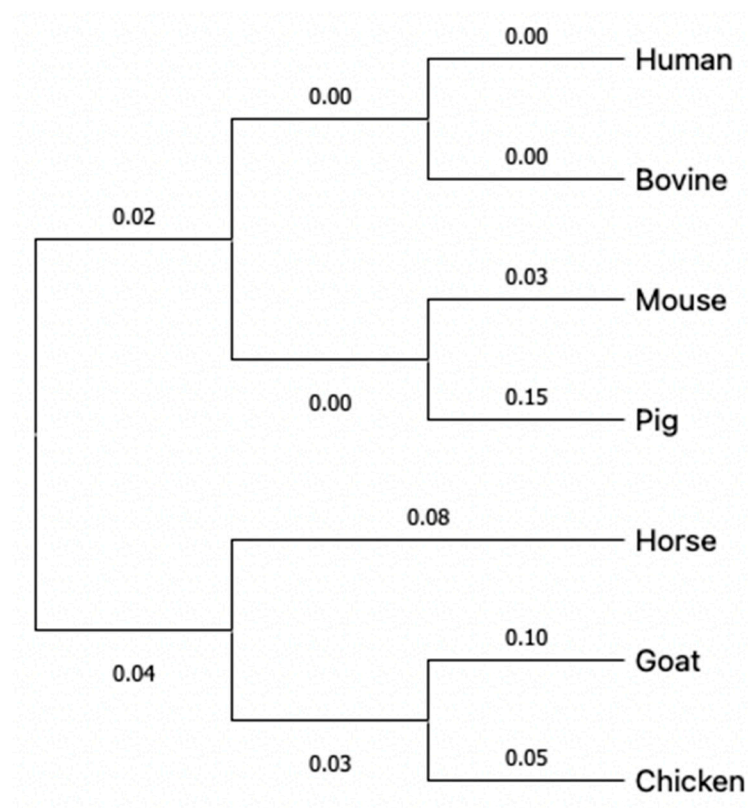

**Figure S3. Phylogenetic tree based on the amino acid sequences of *HMGA2* among different species.** Note: Bootstrap method: 1000
